# Supplementary material for: Understanding the charge dynamics in organic light-emitting diodes using convolutional neural network
Source: Royal Society of Chemistry journal article supplement (doi:10.1039/d2mh00373b), 2022-01-01
Supplement: d2mh00373b1.pdf [file d2mh00373b1.pdf]

## Supporting Information

# **Understanding the charge dynamics in organic light-emitting diodes using convolutional neural network**

**Jae-Min Kim, Junseop Lim, and Jun Yeob Lee\***

School of Chemical Engineering, Sungkyunkwan University  
2066, Seobu-ro, Jangan-gu, Suwon, Gyeonggi-do, 16419, Republic of Korea

E-mail: leej17@skku.edu

\* To whom correspondence should be addressed.

## Supplementary Section 1

### Supplementary Figures

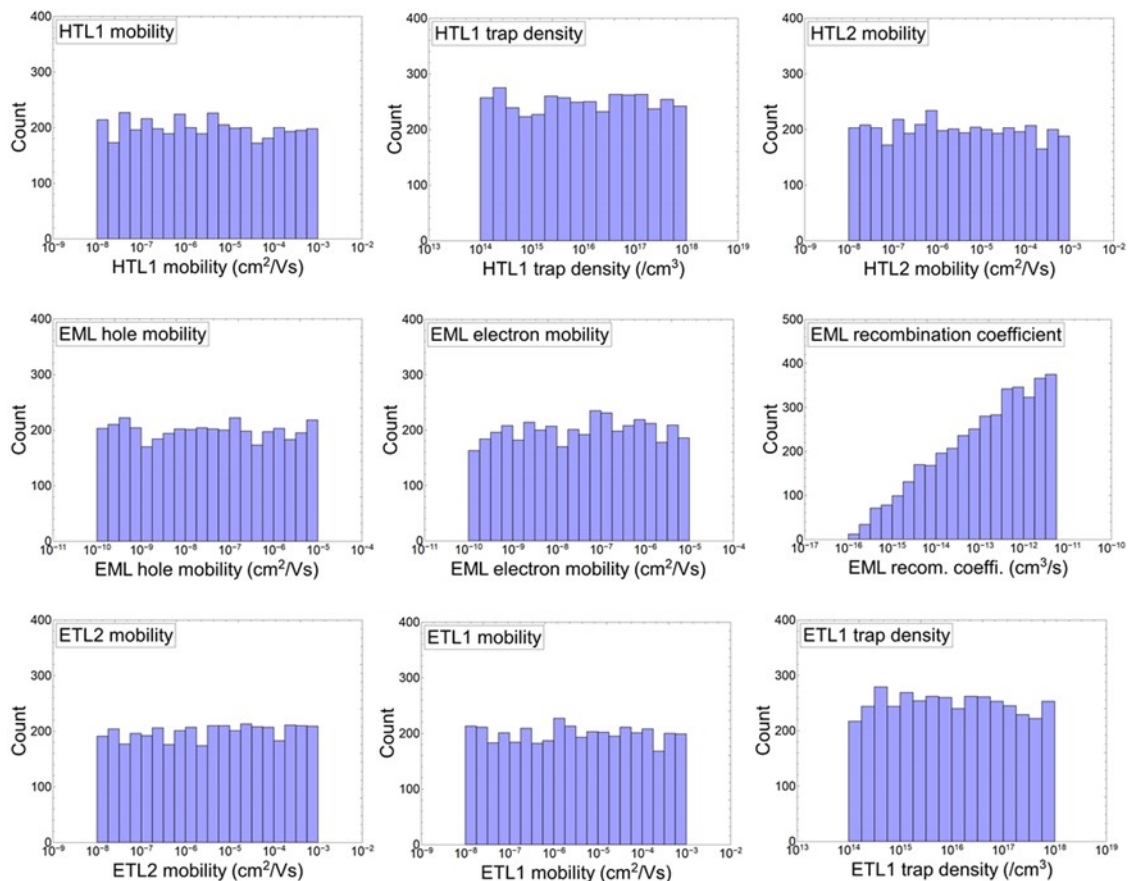

Figure S1. The distribution of the dataset as an output parameter.

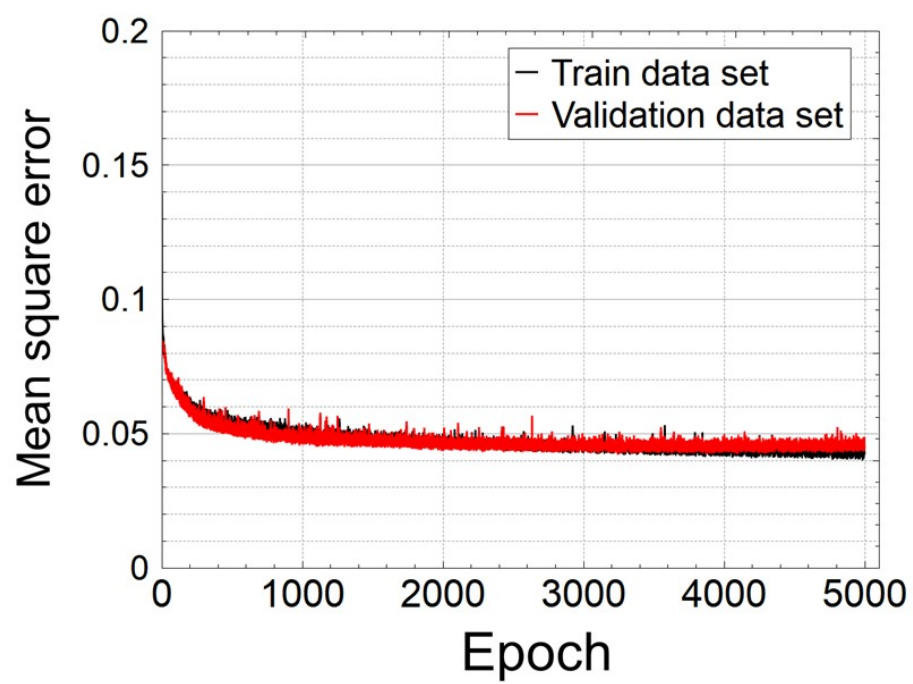

Figure S2. The learning curve of CNN-based neural network.

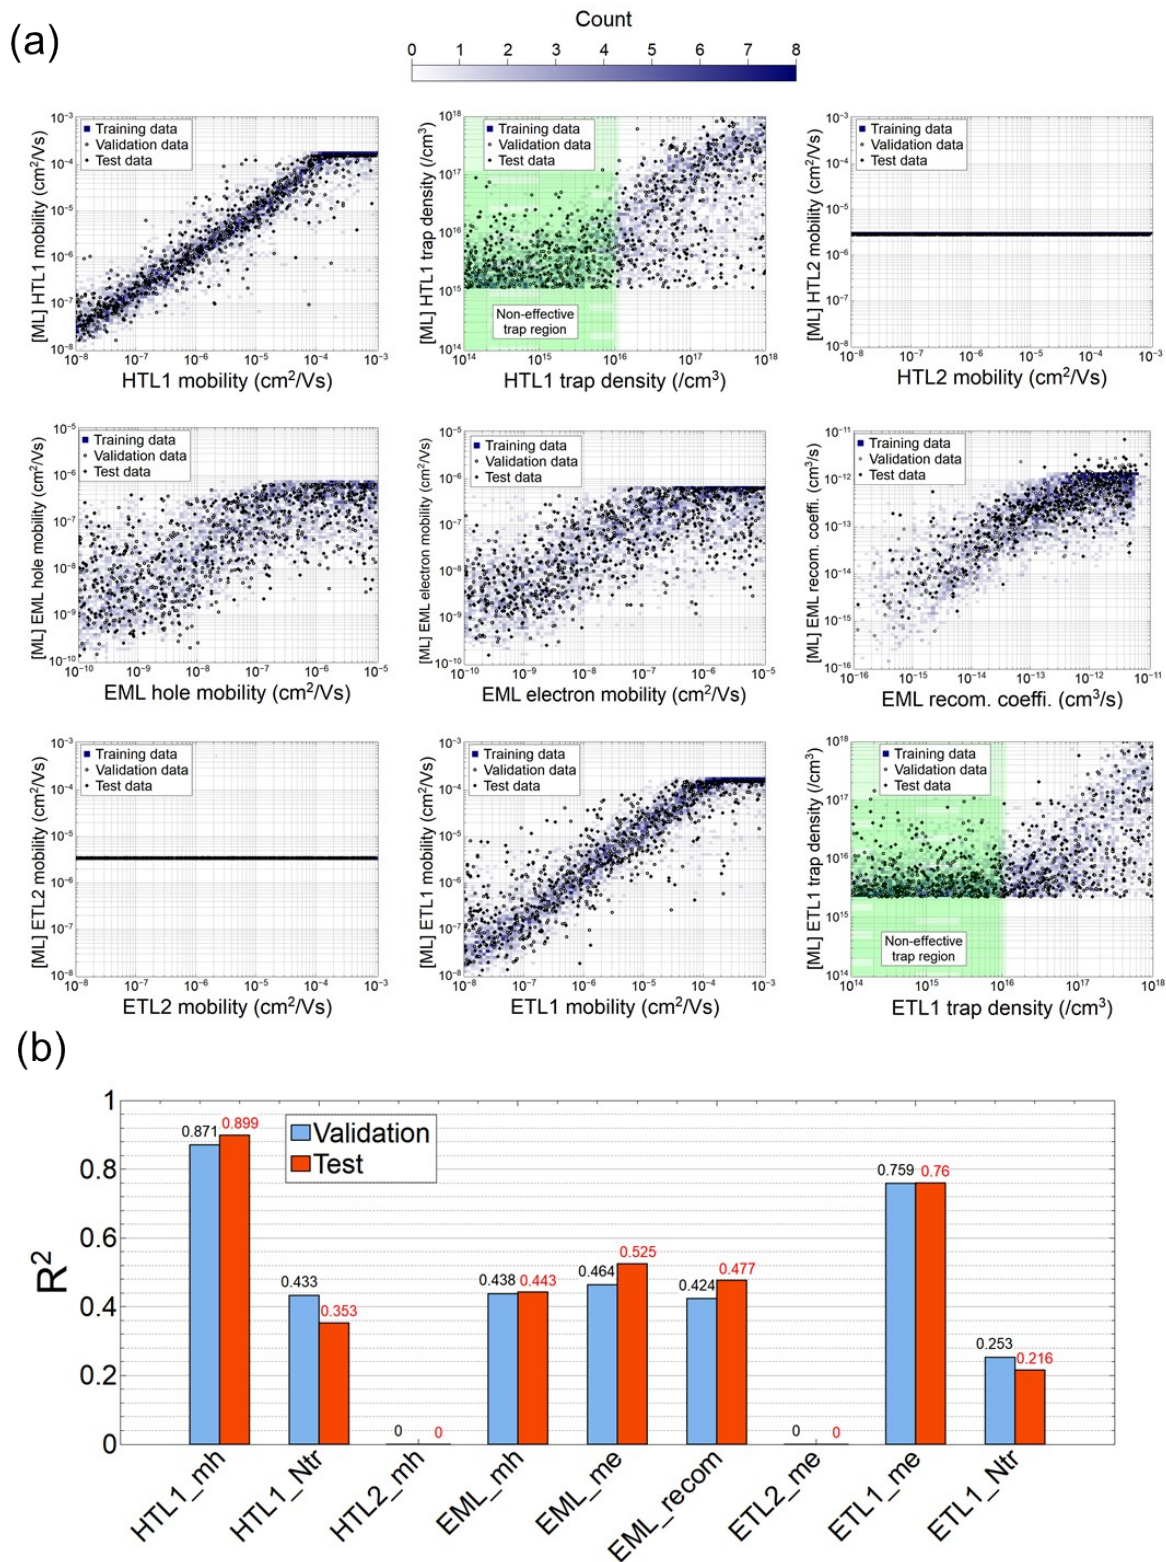

Figure S3. Prediction performance of the single task CNN models. (a) Distribution of predicted values for train/validation/test dataset. (b) R<sup>2</sup> values of the CNN model applied in the validation and test dataset.

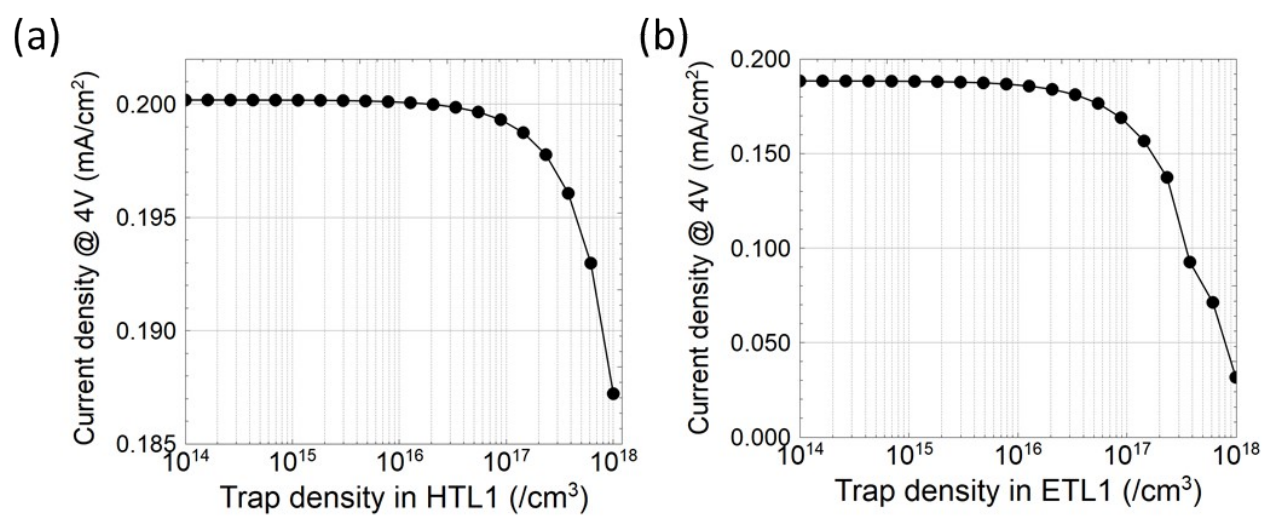

Figure S4. The current density at 4V according to various trap densities in HTL1 and ETL2 calculated by the drift-diffusion simulation.

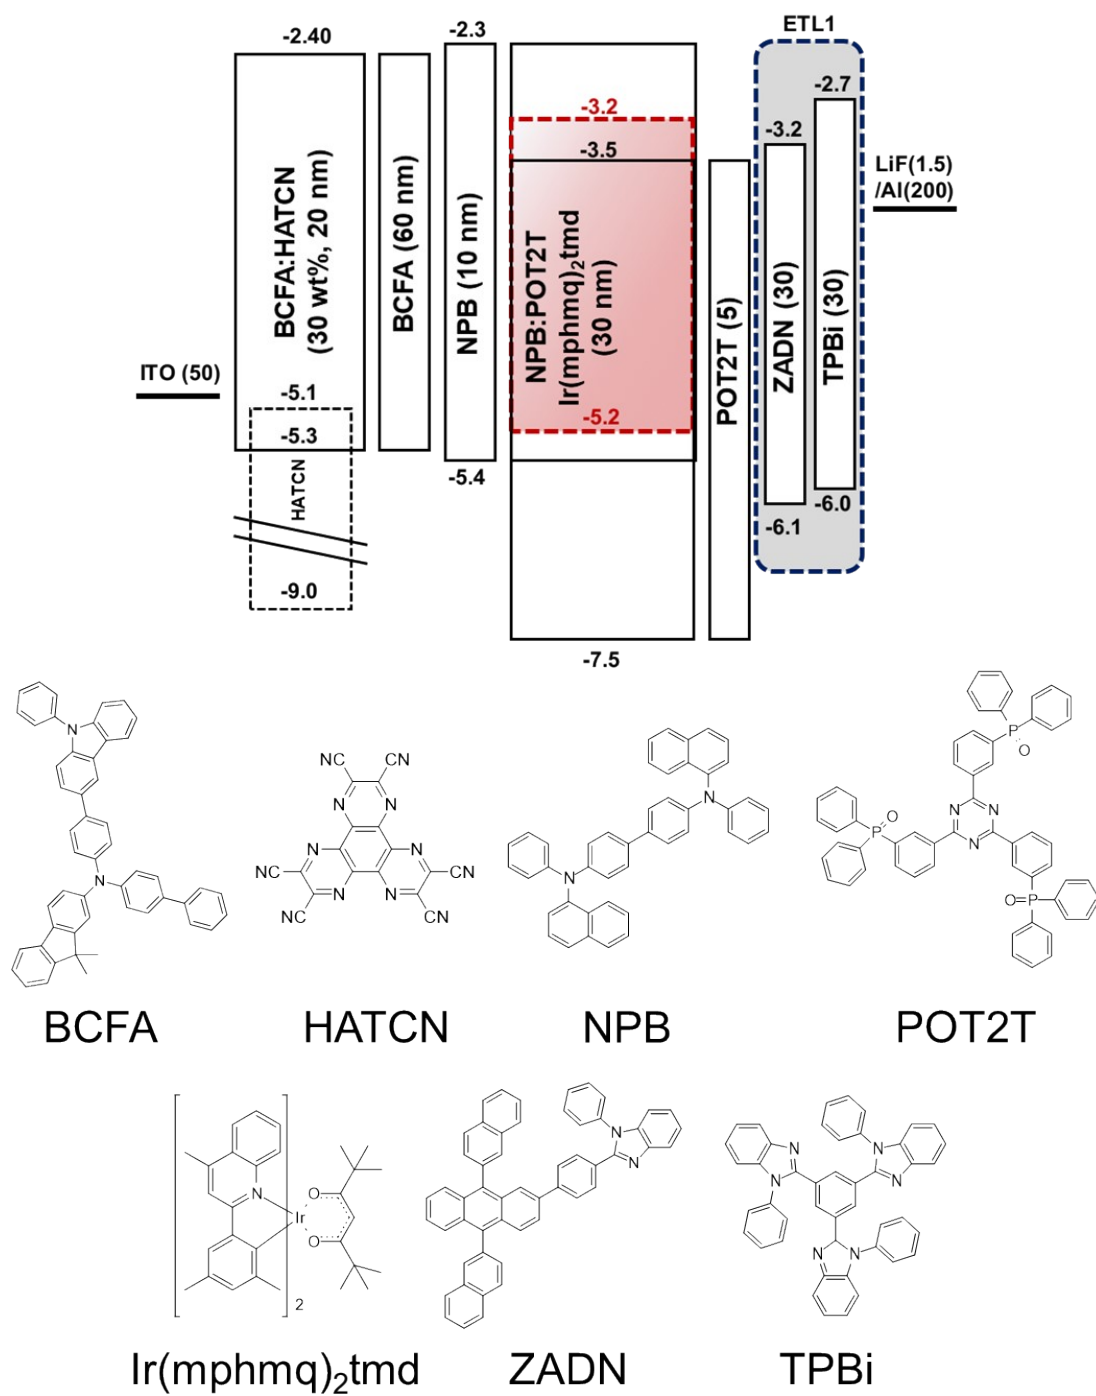

Figure S5. The device and molecular structures of red PhOLEDs.

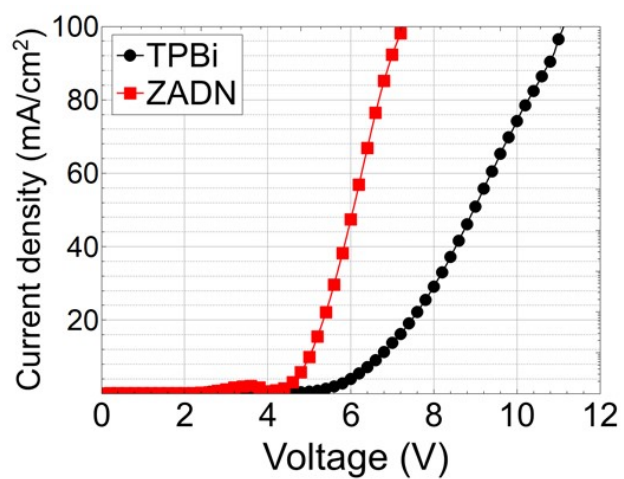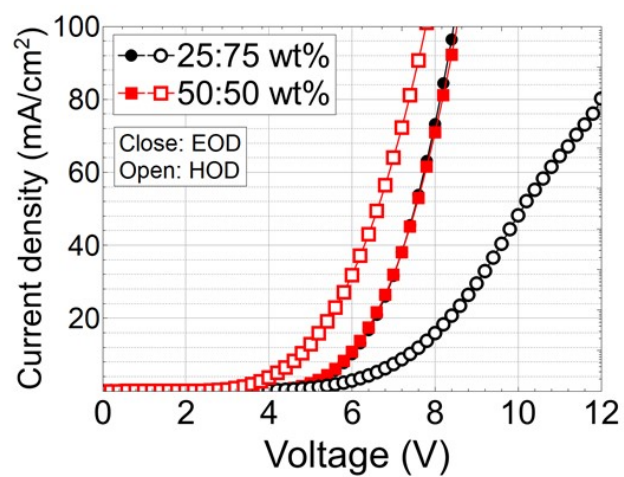

Figure S6. The current density-voltage characteristics of the unipolar charge devices.



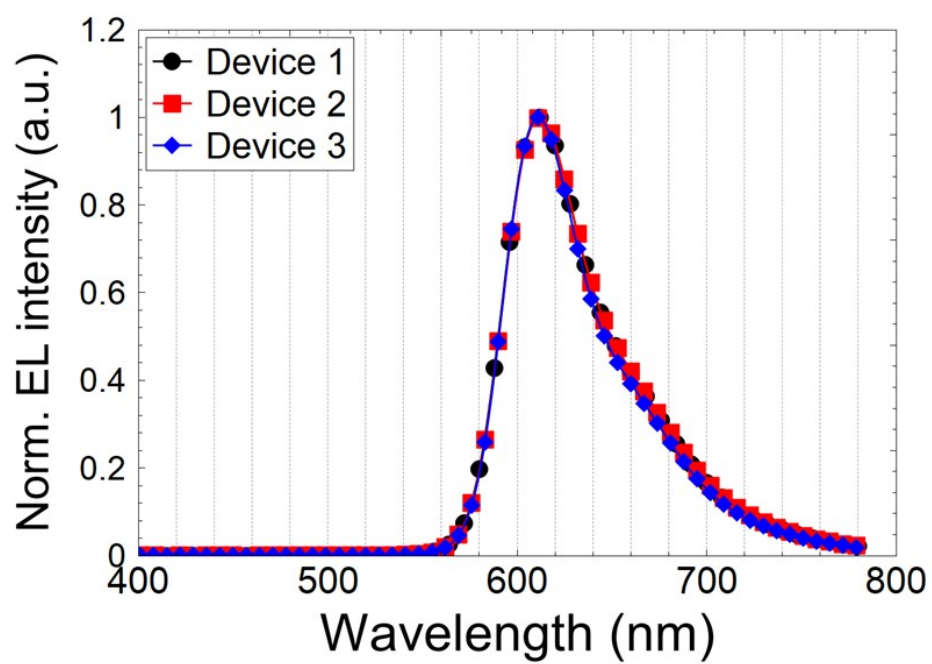

Figure S7. Electroluminescence spectra of red PhOLEDs.



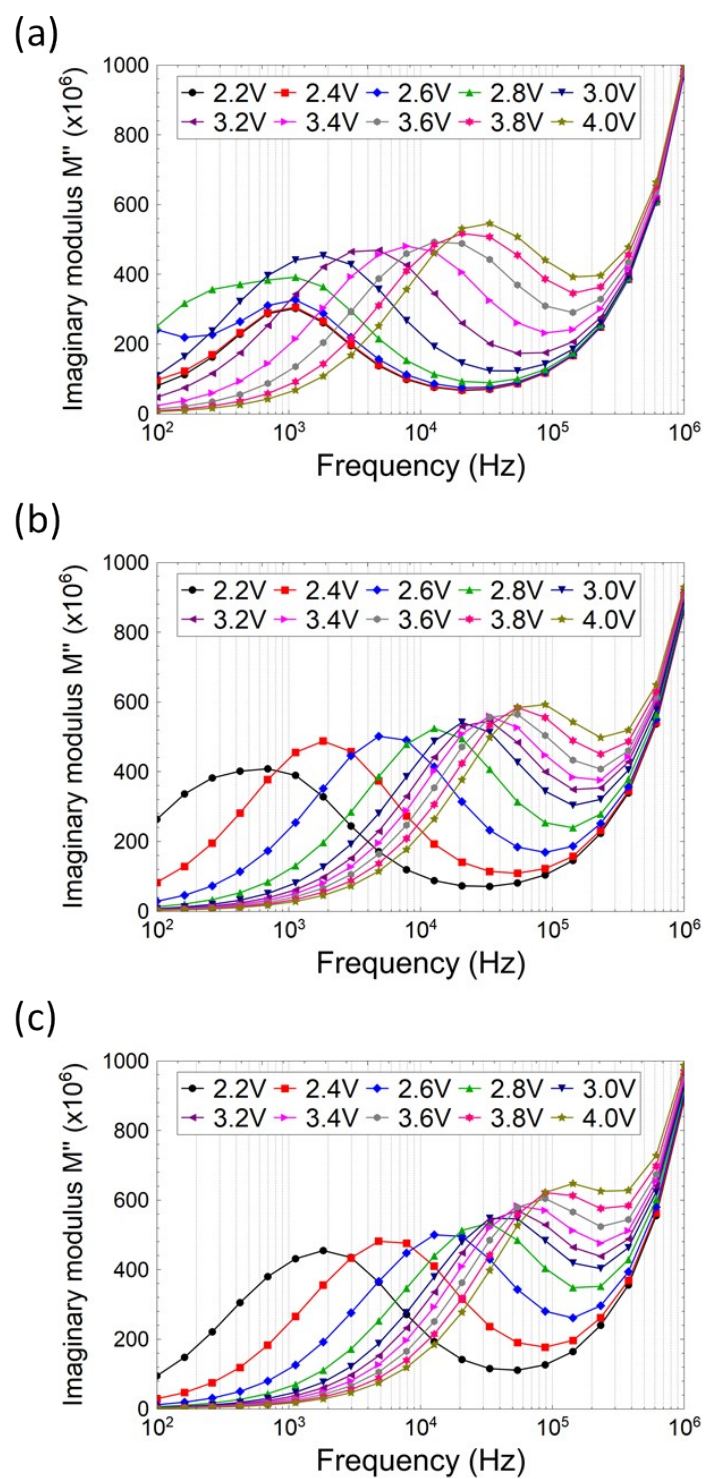

Figure S8. The modulus spectra of (a) device 1, (b) device 2, and (c) device 3.

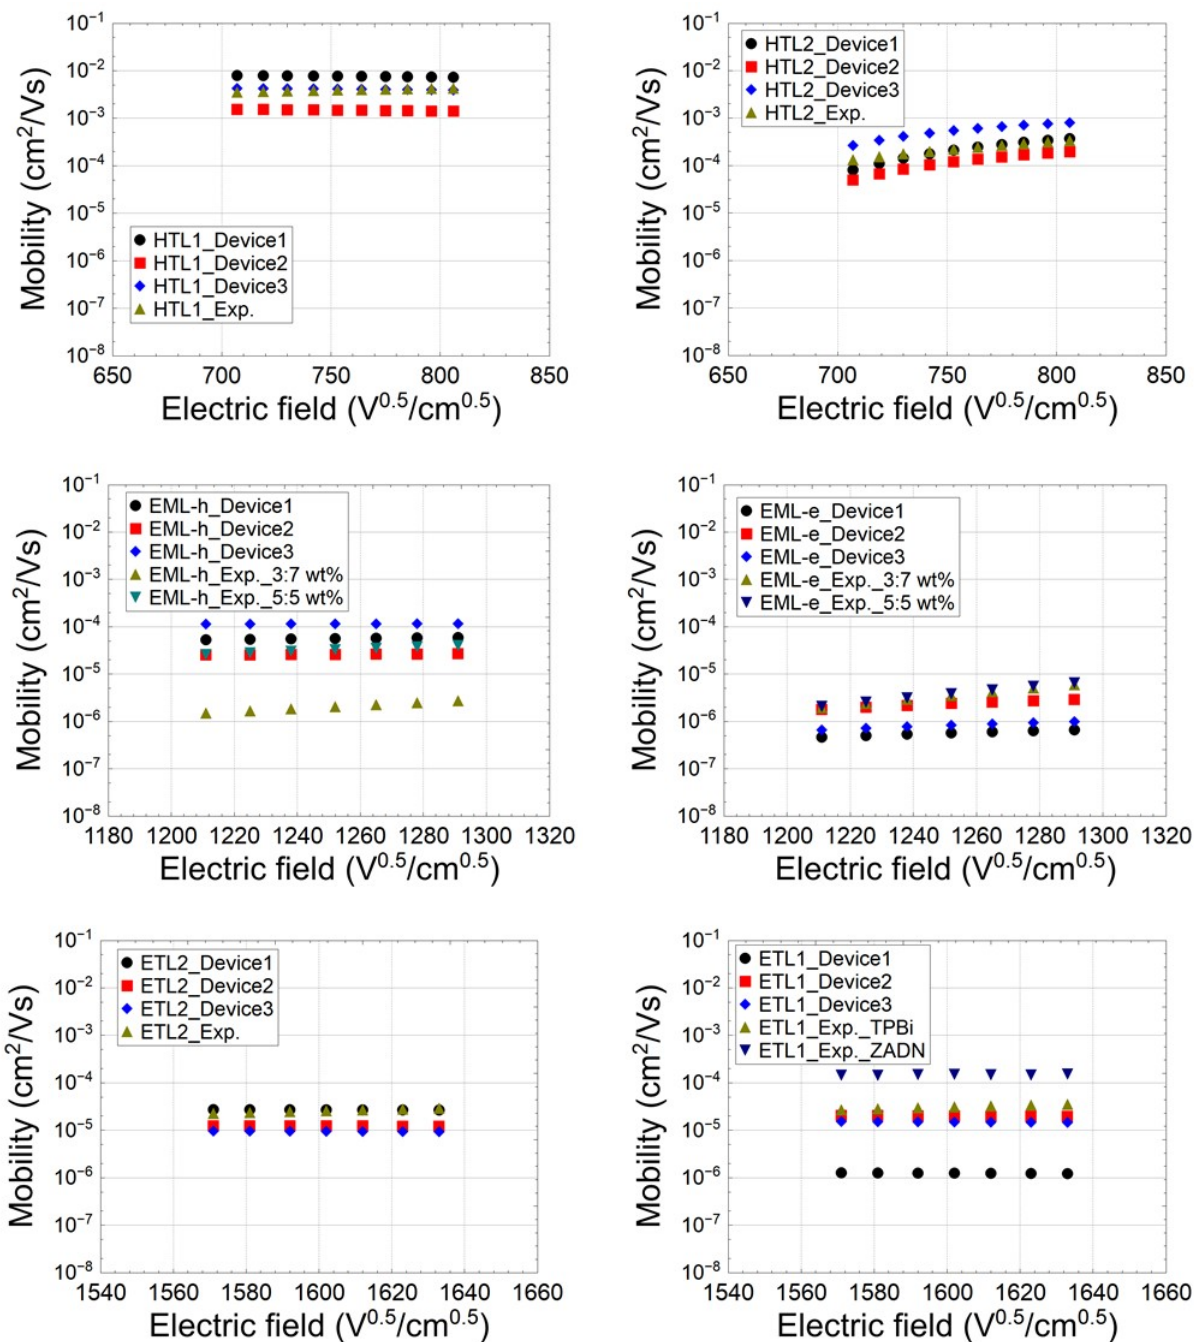

Figure S9. Predicted and experimental charge carrier mobilities of the organic layers used in the devices. The structures of the hole only devices for HTL1/HTL2/EML were ITO/HTL1 (50 nm)/Al, ITO/HTL1 (50 nm)/HTL2 (50 nm)/Al, and ITO/HTL1 (20 nm)/HTL2 (5 nm)/EML (30 nm)/HTL1 (10 nm)/Al. The structures of the electron only devices for ETL1/ETL2/EML were ITO/ETL1 (50 nm)/LiF/Al, ITO/ETL2 (50 nm)/ETL1 (50 nm)/LiF/Al, and ITO/ETL2 (10 nm)/EML (30nm)/ETL2 (5 nm)/ETL1 (30 nm)/LiF/Al.

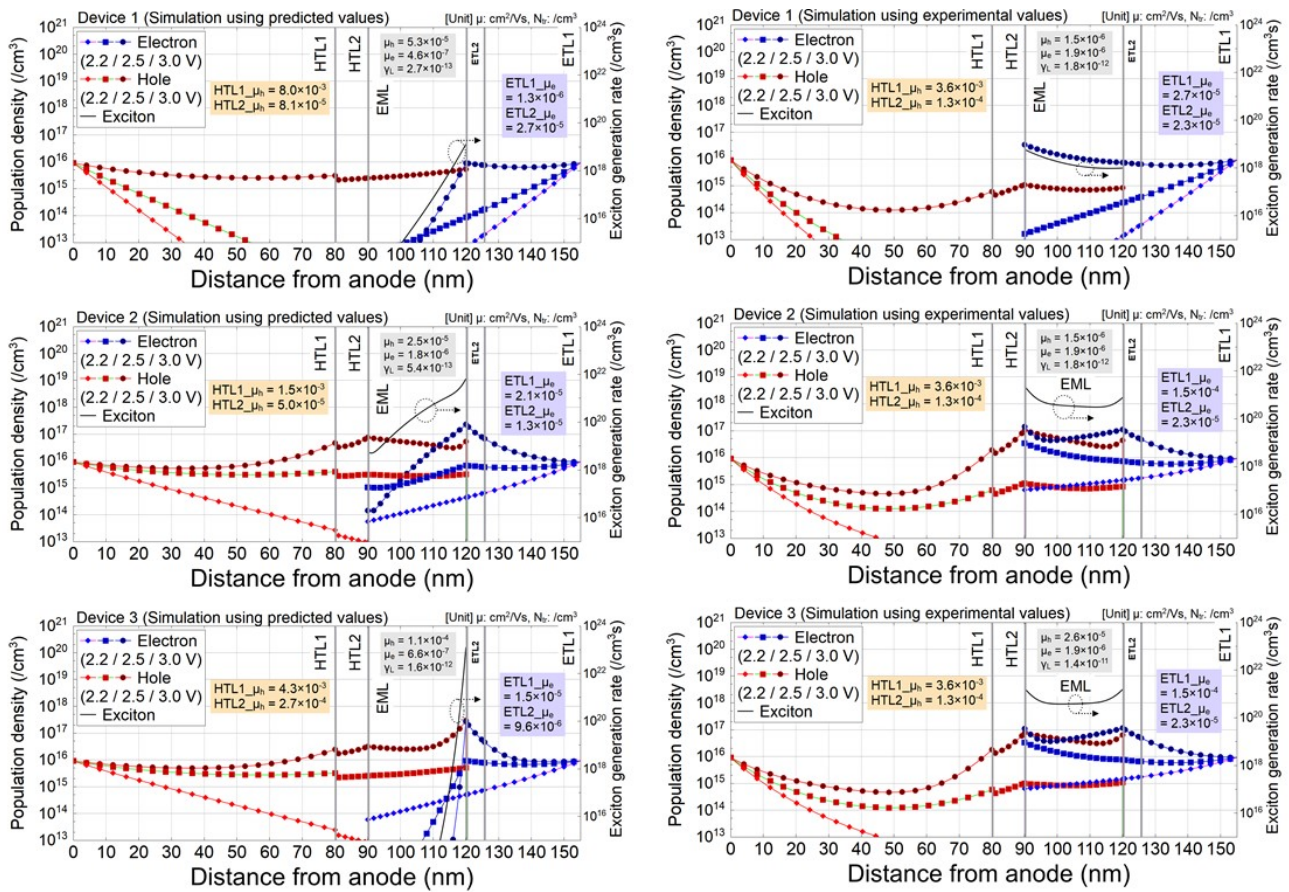

Figure S10. Spatial charge and exciton distributions for various operating voltages in red PhOLEDs simulated by the drift-diffusion modeling with predicted and experimental electrical properties.

## Supplementary Tables

Table S1. The boundaries of the output parameters in the dataset.

|                       | Min. value | Max. value | Unit                                        |
|-----------------------|------------|------------|---------------------------------------------|
| HTL1 mobility         | $10^{-8}$  | $10^{-3}$  | $\text{cm}^2 \text{ V}^{-1} \text{ s}^{-1}$ |
| HTL1 trap density     | $10^{14}$  | $10^{18}$  | $\text{cm}^{-3}$                            |
| HTL2 mobility         | $10^{-8}$  | $10^{-3}$  | $\text{cm}^2 \text{ V}^{-1} \text{ s}^{-1}$ |
| EML hole mobility     | $10^{-10}$ | $10^{-5}$  | $\text{cm}^2 \text{ V}^{-1} \text{ s}^{-1}$ |
| EML electron mobility | $10^{-10}$ | $10^{-5}$  | $\text{cm}^2 \text{ V}^{-1} \text{ s}^{-1}$ |
| EML recom. coeff.     | $10^{-16}$ | $10^{-11}$ | $\text{cm}^3 \text{ s}^{-1}$                |
| ETL2 mobility         | $10^{-8}$  | $10^{-3}$  | $\text{cm}^2 \text{ V}^{-1} \text{ s}^{-1}$ |
| ETL1 mobility         | $10^{-8}$  | $10^{-3}$  | $\text{cm}^2 \text{ V}^{-1} \text{ s}^{-1}$ |
| ETL1 trap density     | $10^{14}$  | $10^{18}$  | $\text{cm}^{-3}$                            |

Table S2. The performance of the CNN based model according to the number of filters and nodes in the neural network. Dropout and learning rates were 0.5 and 0.001.

| # of filters<br>in cov<br>layer1 | # of filters<br>in cov<br>layer2 | # of filters<br>in cov<br>layer3 | # of nodes<br>in dense<br>layer | $R^2$ | $R^2_{\mu\text{HTL1}}$ | $R^2_{\text{hEML}}$ | $R^2_{\text{eEML}}$ | $R^2_{\mu\text{ETL1}}$ | MSE   |
|----------------------------------|----------------------------------|----------------------------------|---------------------------------|-------|------------------------|---------------------|---------------------|------------------------|-------|
| 5                                | 5                                | 5                                | 50                              | 0.424 | 0.856                  | 0.354               | 0.330               | 0.617                  | 0.053 |
| 10                               | 10                               | 10                               | 50                              | 0.401 | 0.832                  | 0.344               | 0.262               | 0.604                  | 0.055 |
| 20                               | 20                               | 20                               | 50                              | 0.505 | 0.830                  | 0.454               | 0.451               | 0.720                  | 0.048 |
| 40                               | 40                               | 40                               | 50                              | 0.514 | 0.834                  | 0.522               | 0.460               | 0.716                  | 0.047 |
| 60                               | 60                               | 60                               | 50                              | 0.523 | 0.847                  | 0.502               | 0.484               | 0.724                  | 0.047 |
| 80                               | 80                               | 80                               | 50                              | 0.485 | 0.795                  | 0.448               | 0.483               | 0.737                  | 0.049 |
| 60                               | 60                               | 60                               | 20                              | 0.421 | 0.713                  | 0.400               | 0.372               | 0.637                  | 0.054 |
| 60                               | 60                               | 60                               | 100                             | 0.536 | 0.846                  | 0.518               | 0.529               | 0.766                  | 0.047 |
| 60                               | 60                               | 60                               | 200                             | 0.534 | 0.878                  | 0.511               | 0.552               | 0.788                  | 0.048 |

Table S3. The performance of the CNN based model according to the drop rate. 60 filters and 100 nodes were used in the convolutional layers and the dense layer. The learning rate was 0.001.

| Drop rate | R <sup>2</sup> | R <sup>2</sup> _μHTL1 | R <sup>2</sup> _hEML | R <sup>2</sup> _eEML | R <sup>2</sup> _μETL1 | MSE   |
|-----------|----------------|-----------------------|----------------------|----------------------|-----------------------|-------|
| 0.3       | 0.536          | 0.846                 | 0.518                | 0.529                | 0.766                 | 0.047 |
| 0.4       | 0.524          | 0.857                 | 0.475                | 0.564                | 0.709                 | 0.046 |
| 0.5       | 0.536          | 0.825                 | 0.526                | 0.520                | 0.743                 | 0.046 |
| 0.6       | 0.494          | 0.772                 | 0.483                | 0.491                | 0.675                 | 0.048 |

Table S4. The performance of the CNN based model according to the layer structure of the neural network. 60 filters and 100 nodes were used in the convolutional layers and the dense layer. Dropout and learning rates were 0.5 and 0.001.

| Layer structure                        | $R^2$ | $R^2_{\mu\text{HTL1}}$ | $R^2_{\text{hEML}}$ | $R^2_{\text{eEML}}$ | $R^2_{\mu\text{ETL1}}$ | MSE   |
|----------------------------------------|-------|------------------------|---------------------|---------------------|------------------------|-------|
| Conv / pooling                         | 0.181 | 0.620                  | 0.126               | 0.079               | 0.162                  | 0.069 |
| Conv / pooling / Conv                  | 0.417 | 0.818                  | 0.340               | 0.370               | 0.582                  | 0.054 |
| Conv / pooling / Conv / pooling / Conv | 0.536 | 0.825                  | 0.526               | 0.520               | 0.743                  | 0.046 |
| Conv / pooling / Conv / Conv           | 0.526 | 0.828                  | 0.524               | 0.507               | 0.719                  | 0.046 |



Table S5. The performance of the CNN based model according to the structure of the dense layer. 60 filters were used in the convolutional layers. Dropout and learning rates were 0.5 and 0.001.

| Structure of dense layers | R <sup>2</sup> | R <sup>2</sup> <sub>μHTL1</sub> | R <sup>2</sup> <sub>hEML</sub> | R <sup>2</sup> <sub>eEML</sub> | R <sup>2</sup> <sub>μETL1</sub> | MSE   |
|---------------------------|----------------|---------------------------------|--------------------------------|--------------------------------|---------------------------------|-------|
| 100                       | 0.536          | 0.825                           | 0.526                          | 0.520                          | 0.743                           | 0.046 |
| 100 / 100                 | 0.511          | 0.849                           | 0.488                          | 0.440                          | 0.718                           | 0.047 |
| 100 / 100 / 100           | 0.432          | 0.849                           | 0.331                          | 0.337                          | 0.700                           | 0.054 |
| 100 / 50 / 50             | 0.513          | 0.840                           | 0.492                          | 0.502                          | 0.711                           | 0.047 |

Table S6. The performance of the CNN based model according to the learning rate. 60 filters and 100 nodes were used in the convolutional layers and the dense layer. Dropout rate was 0.5.

| Learning rate | R <sup>2</sup> | R <sup>2</sup> <sub>μHTL1</sub> | R <sup>2</sup> <sub>hEML</sub> | R <sup>2</sup> <sub>eEML</sub> | R <sup>2</sup> <sub>μETL1</sub> | MSE   |
|---------------|----------------|---------------------------------|--------------------------------|--------------------------------|---------------------------------|-------|
| 0.002         | 0.465          | 0.805                           | 0.413                          | 0.350                          | 0.696                           | 0.050 |
| 0.001         | 0.536          | 0.825                           | 0.526                          | 0.520                          | 0.743                           | 0.046 |
| 0.0005        | 0.528          | 0.831                           | 0.514                          | 0.487                          | 0.754                           | 0.046 |
| 0.0001        | 0.516          | 0.855                           | 0.462                          | 0.490                          | 0.713                           | 0.047 |

## Supplementary Section 2

### Supplementary information of the drift-diffusion simulation

The charge transport in organic light-emitting diodes was described by the electric field-driven transport (drift current) and the differential concentration-driven transport (diffusion current) as following equations.<sup>[1-4]</sup>

$$\frac{\varepsilon_0 \varepsilon_r \partial^2 \varphi(x,t)}{q \partial x^2} = p(x,t) - n(x,t) + N_D + N_A + \sum \rho_t(x,t)$$

$$\frac{\partial p(x,t)}{\partial t} = \frac{1}{q} \frac{\partial}{\partial x} \left[ -\frac{\mu_p kT}{q} \frac{\partial p(x,t)}{\partial x} - \mu_p p(x,t) \frac{\partial \varphi(x,t)}{\partial x} \right] + R(x,t)$$

$\varepsilon_0$ ,  $\varepsilon_r$ ,  $q$ ,  $\varphi(x,t)$ ,  $p(x,t)$ ,  $n(x,t)$ ,  $N_D$ ,  $N_A$ ,  $\rho_t$ , and  $R$  are the vacuum permittivity, dielectric permittivity, electronic charge, electric potential, hole density, electron density, ionized donor density, ionized acceptor density, trap charge, and recombination rate, respectively. To mathematically realize the charge transport in the density of states in the organic semiconductors, the combination of mobility and trap distribution was adopted in the simulation. The number of the trapped holes with the trap density  $N_t(E)$  and trap distribution function  $f_t$  was described by

$$\rho_t(x,t) = \int (1 - f_t(E,x,t)) N_t(E) dE$$

The trap distribution was assumed as an exponential distribution in the bandgap energetic region. The impedance in the small perturbation condition was derived by introducing time-dependent oscillation terms to the steady-state parameters as follows.<sup>[1,5-7]</sup>

$$n(x,t) = n(x) + \tilde{n}(x) e^{i\omega t}$$

$$p(x,t) = p(x) + \tilde{p}(x) e^{i\omega t}$$

$$\phi(x,t) = \phi(x) + \tilde{\phi}(x) e^{i\omega t}$$

$\tilde{n}(x)$ ,  $\tilde{p}(x)$ , and  $\tilde{\phi}(x)$  was assumed as a small amplitude in the perturbation function and  $\omega$  is the angular frequency. The device structure of OLED is set to ITO / HTL1 (80 nm) / HTL2 (10 nm) / EML (30 nm) / ETL2 (5 nm) / ETL1 (30 nm) / Al. The injection barrier at the organic/metal electrodes interfaces was assumed to be 0.3 eV. The output physical values in the datasets, which were HTL1 hole mobility, HTL1 trap density, HTL2 mobility, EML hole mobility, electron mobility, recombination coefficient, ETL2 mobility, ETL1 electron mobility, and ETL1 trap density, were normalized to have the values from 0 to 1 and utilized in the machine learning framework for enhancing the predictivity. The physical parameters were randomly generated in the log-scale to uniformly distribute the values in the log-scale dimension. For the modulus spectra, the normalization of the modulus intensity for each case was performed based on the maximum modulus value in whole datasets rather than the maximum value of each case because relative intensity in the modulus spectra was correlated with the capacitor components (charge storage or accumulation) in the charge dynamics.

## References

- [1] J. Staudigel, M. Stöbel, F. Steuber, J. Simmerer, *J. Appl. Phys.* **1999**, *86*, 3895–3910.
- [2] B. Ruhstaller, S. A. Carter, S. Barth, H. Riel, W. Riess, J. C. Scott, *J. Appl. Phys.* **2001**, *89*, 4575–4586.
- [3] J. -M. Kim, C. H. Lee, J. J. Kim, *Appl. Phys. Lett.* **2017**, *111*, 75307.
- [4] C. H. Lee, J. H. Lee, K. H. Kim, J. J. Kim, *Adv. Funct. Mater.* **2018**, *28*, 1–8.
- [5] N. D. Nguyen, M. Schmeits, *Phys. Status Solidi A* **2006**, *203*, 1901–1914.
- [6] E. Knapp, B. Ruhstaller, *Appl. Phys. Lett.* **2011**, *99*, 37–40.
- [7] E. Knapp, B. Ruhstaller, *Opt. Quantum Electron.* **2011**, *42*, 667–677.
